# Supplementary material for: Co-occurrence and Mutual Exclusivity Analysis of DNA Methylation Reveals Distinct Subtypes in Multiple Cancers
Source: Front Cell Dev Biol. 2020 Jan 29;8:20. doi: 10.3389/fcell.2020.00020 (PMC7000380; doi:10.3389/fcell.2020.00020)
Supplement: Supplementary file 2 [file Table_1.XLSX]

## Sheet: statistics
Cancer	#Tumor	#Normal	Age (mean±std)	Gender	Survival Status	Overall Survival (mean±std, month)	Histological Type	Neoplasm Histologic Grade	Pathologic Stage
BLCA	412	21	68.06 ± 10.61	MALE/FEMALE: 304/108	Alive/Dead: 228/180	68.06 ± 10.61	Muscle invasive urothelial carcinoma (pT2 or above): 409	High Grade/Low Grade: 389/20	Stage I/Stage II/Stage III/Stage IV: 2/130/141/137
BRCA	788	98	57.96 ± 13.18	MALE/FEMALE: 9/777	Alive/Dead: 679/105	57.96 ± 13.18	Infiltrating Carcinoma NOS/Infiltrating Ductal Carcinoma/Infiltrating Lobular Carcinoma/Medullary Carcinoma/Metaplastic Carcinoma/Mixed Histology (please specify)/Mucinous Carcinoma/Other, specify: 1/516/179/6/9/26/15/33		Stage I/Stage IA/Stage IB/Stage II/Stage IIA/Stage IIB/Stage III/Stage IIIA/Stage IIIB/Stage IIIC/Stage IV/Stage X/[Discrepancy]: 60/62/5/6/242/191/2/126/18/54/11/5/2
COAD	299	38	64.85 ± 13.27	MALE/FEMALE: 158/138	Alive/Dead: 219/69	64.85 ± 13.27	Colon Adenocarcinoma/Colon Mucinous Adenocarcinoma/[Discrepancy]: 254/39/3		Stage I/Stage IA/Stage II/Stage IIA/Stage IIB/Stage IIC/Stage III/Stage IIIA/Stage IIIB/Stage IIIC/Stage IV/Stage IVA/Stage IVB/[Discrepancy]: 43/1/15/94/6/1/6/5/48/27/23/16/2/3
ESCA	186	16	62.41 ± 11.87	MALE/FEMALE: 159/27	Alive/Dead: 108/78	62.41 ± 11.87	Esophagus Adenocarcinoma, NOS/Esophagus Squamous Cell Carcinoma: 89/97	G1/G2/G3/GX: 19/77/49/41	Stage I/Stage IA/Stage IB/Stage II/Stage IIA/Stage IIB/Stage III/Stage IIIA/Stage IIIB/Stage IIIC/Stage IV/Stage IVA: 8/5/6/1/47/31/26/14/9/7/5/4
HNSC	530	50	60.91 ± 11.91	MALE/FEMALE: 387/143	Alive/Dead: 303/224	60.91 ± 11.91	Head & Neck Squamous Cell Carcinoma/Head & Neck Squamous Cell Carcinoma Basaloid Type/Head & Neck Squamous Cell Carcinoma, Spindle Cell Variant: 519/10/1	G1/G2/G3/G4/GX: 64/312/125/7/18	Stage I/Stage II/Stage III/Stage IVA/Stage IVB/Stage IVC/[Discrepancy]: 27/77/82/259/12/1/1
KIRC	320	160	61.35 ± 11.81	MALE/FEMALE: 206/114	Alive/Dead: 213/105	61.35 ± 11.81	Kidney Clear Cell Renal Carcinoma: 320	G1/G2/G3/G4/GX: 9/133/124/50/2	Stage I/Stage II/Stage III/Stage IV/[Discrepancy]: 156/31/73/59/1
KIRP	276	45	61.68 ± 12.06	MALE/FEMALE: 202/74	Alive/Dead: 233/40	61.68 ± 12.06	Kidney Papillary Renal Cell Carcinoma: 276		Stage I/Stage II/Stage III/Stage IV/[Discrepancy]: 168/19/51/14/2
LIHC	379	50	59.48 ± 13.48	MALE/FEMALE: 257/122	Alive/Dead: 241/132	59.48 ± 13.48	Fibrolamellar Carcinoma/Hepatocellular Carcinoma/Hepatocholangiocarcinoma (Mixed): 3/369/7	G1/G2/G3/G4: 55/181/125/13	Stage I/Stage II/Stage III/Stage IIIA/Stage IIIB/Stage IIIC/Stage IV/Stage IVA/Stage IVB/[Discrepancy]: 176/88/3/65/9/9/2/1/2/2
LUAD	460	32	65.13 ± 10.13	MALE/FEMALE: 216/244	Alive/Dead: 288/161	65.13 ± 10.13	Lung Acinar Adenocarcinoma/Lung Adenocarcinoma Mixed Subtype/Lung Adenocarcinoma- Not Otherwise Specified (NOS)/Lung Bronchioloalveolar Carcinoma Mucinous/Lung Bronchioloalveolar Carcinoma Nonmucinous/Lung Clear Cell Adenocarcinoma/Lung Micropapillary Adenocarcinoma/Lung Mucinous Adenocarcinoma/Lung Papillary Adenocarcinoma/Lung Signet Ring Adenocarcinoma/Lung Solid Pattern Predominant Adenocarci…		Stage I/Stage IA/Stage IB/Stage II/Stage IIA/Stage IIB/Stage IIIA/Stage IIIB/Stage IV/[Discrepancy]: 5/120/125/1/49/62/64/9/20/4
LUSC	372	43	67.58 ± 8.73	MALE/FEMALE: 274/96	Alive/Dead: 208/155	67.58 ± 8.73	Lung Basaloid Squamous Cell Carcinoma/Lung Papillary Squamous Cell Caricnoma/Lung Small Cell Squamous Cell Carcinoma/Lung Squamous Cell Carcinoma- Not Otherwise Specified (NOS): 12/5/1/352		Stage I/Stage IA/Stage IB/Stage II/Stage IIA/Stage IIB/Stage III/Stage IIIA/Stage IIIB/Stage IV/[Discrepancy]: 3/71/98/3/60/72/3/47/6/4/3
PAAD	185	10	64.78 ± 10.96	MALE/FEMALE: 103/82	Alive/Dead: 85/99	64.78 ± 10.96	Pancreas-Adenocarcinoma Ductal Type/Pancreas-Adenocarcinoma-Other Subtype/Pancreas-Colloid (mucinous non-cystic) Carcinoma/Pancreas-Undifferentiated Carcinoma/[Discrepancy]: 153/26/4/1/1	G1/G2/G3/G4/GX: 32/98/51/2/2	Stage I/Stage IA/Stage IB/Stage IIA/Stage IIB/Stage III/Stage IV/[Discrepancy]: 1/5/15/30/121/5/6/1
PRAD	499	50	61.02 ± 6.82	MALE/FEMALE: 499/0	Alive/Dead: 488/10	61.02 ± 6.82	Prostate Adenocarcinoma Acinar Type/Prostate Adenocarcinoma, Other Subtype: 484/15
THCA	515	56	47.22 ± 15.79	MALE/FEMALE: 140/375	Alive/Dead: 498/16	47.22 ± 15.79	Other, specify/Thyroid Papillary Carcinoma - Classical/usual/Thyroid Papillary Carcinoma - Follicular (>= 99% follicular patterned)/Thyroid Papillary Carcinoma - Tall Cell (>= 50% tall cell features): 9/367/102/37		Stage I/Stage II/Stage III/Stage IV/Stage IVA/Stage IVC: 290/52/114/2/49/6
UCEC	432	46	64.22 ± 11.2	MALE/FEMALE: 0/432	Alive/Dead: 356/74	64.22 ± 11.2	Endometrioid endometrial adenocarcinoma/Mixed serous and endometrioid/Serous endometrial adenocarcinoma: 313/21/98	G1/G2/G3/High Grade: 63/91/267/11
