# Supplementary material for: Co-occurrence and Mutual Exclusivity Analysis of DNA Methylation Reveals Distinct Subtypes in Multiple Cancers
Source: Front Cell Dev Biol. 2020 Jan 29;8:20. doi: 10.3389/fcell.2020.00020 (PMC7000380; doi:10.3389/fcell.2020.00020)
Supplement: Supplementary file 4 [file Table_3.XLSX]

## Sheet: Supplementary table3
Category	Enriched Terms	Number of cancer	Tool
Biological process	neurofilament bundle assembly	1	DAVID
Biological process	regulation of transcription, DNA-templated	5	DAVID
Biological process	transcription, DNA-templated	5	DAVID
KEGG_PATHWAY	Neuroactive ligand-receptor interaction	1	DAVID
Molecular Function	DNA binding transcription factor activity	6	ToppGene
Molecular Function	RNA polymerase II regulatory region sequence-specific DNA binding	4	ToppGene
Molecular Function	RNA polymerase II regulatory region DNA binding	4	ToppGene
Molecular Function	transcription regulatory region sequence-specific DNA binding	4	ToppGene
Molecular Function	sequence-specific double-stranded DNA binding	4	ToppGene
Molecular Function	double-stranded DNA binding	4	ToppGene
Molecular Function	transcription regulatory region DNA binding	4	ToppGene
Molecular Function	regulatory region nucleic acid binding	4	ToppGene
Molecular Function	sequence-specific DNA binding	4	ToppGene
TFBS	ZNF274	4	Enrichr
Pathway	Generic Transcription Pathway	6	ToppGene
Cytoband	19q13.43	6	ToppGene
Domain	Znf_C2H2/integrase_DNA-bd	6	ToppGene
Domain	KRAB	6	ToppGene
Gene Family	Zinc fingers C2H2-type|BTB domain containing	6	ToppGene
MicroRNA	hsa-miR-1229:mirSVR_nonconserved_highEffect-0.5	2	ToppGene
